# Supplementary material for: Achieving Pain Control in Rheumatoid Arthritis with Baricitinib or Adalimumab Plus Methotrexate: Results from the RA-BEAM Trial
Source: PubMed Central journal article supplement (PMC6617097; doi:10.3390/jcm8060831), 2019-06-12
Supplement: jcm-08-00831-s001.pdf [file jcm-08-00831-s001.pdf]

**Table 1.** Multiple mediator analysis coefficients for adalimumab vs. placebo and baricitinib vs. placebo at Week 24.

| <b>Multiple mediator analysis for adalimumab vs. placebo at Week 24</b>  |                 |                    |           |                |
|--------------------------------------------------------------------------|-----------------|--------------------|-----------|----------------|
| <b>Effect paths</b>                                                      | <b>Mediator</b> | <b>Coefficient</b> | <b>SE</b> | <b>p-value</b> |
| IV to Mediators (a paths)                                                | CRP             | -10.16             | 1.805     | <.0001         |
| IV to Mediators (a paths)                                                | ESR             | -12.20             | 1.960     | <.0001         |
| IV to Mediators (a paths)                                                | SJC28           | -1.996             | 0.455     | <.0001         |
| Direct Effects of Mediators on DV (b paths)                              | CRP             | 0.193              | 0.053     | 0.0003         |
| Direct Effects of Mediators on DV (b paths)                              | ESR             | 0.190              | 0.049     | 0.0001         |
| Direct Effects of Mediators on DV (b paths)                              | SJC28           | 0.840              | 0.184     | <.0001         |
| Total Effect of IV on DV (c paths)                                       |                 | -10.83             | 2.150     | <.0001         |
| Direct Effect of IV on DV (c' paths)                                     |                 | -4.881             | 2.124     | 0.0219         |
| <b>Multiple mediator analysis for baricitinib vs. placebo at Week 24</b> |                 |                    |           |                |
| <b>Effect paths</b>                                                      | <b>Mediator</b> | <b>Coefficient</b> | <b>SE</b> | <b>p-value</b> |
| IV to Mediators (a paths)                                                | CRP             | -14.29             | 1.626     | <.0001         |
| IV to Mediators (a paths)                                                | ESR             | -13.70             | 1.829     | <.0001         |
| IV to Mediators (a paths)                                                | SJC28           | -2.023             | 0.389     | <.0001         |
| Direct Effects of Mediators on DV (b paths)                              | CRP             | 0.122              | 0.048     | 0.0113         |
| Direct Effects of Mediators on DV (b paths)                              | ESR             | 0.171              | 0.042     | <.0001         |
| Direct Effects of Mediators on DV (b paths)                              | SJC28           | 0.945              | 0.174     | <.0001         |
| Total Effect of IV on DV (c paths)                                       |                 | -15.15             | 1.917     | <.0001         |
| Direct Effect of IV on DV (c' paths)                                     |                 | -9.153             | 1.951     | <.0001         |

IV: Independent Variable (treatment); DV: Dependent Variable (change in pain).
